# Supplementary material
Source: MDPI journal article supplement (https://www.mdpi.com/2073-4344/8/10/463)
Supplement: s1 [file s1]

# Supplementary Materials: Interface-Controlled Pd Nanodot-Au Nanoparticle Colloids for Efficient Visible-Light-Induced Photocatalytic Suzuki-Miyaura Coupling Reaction

Eunmi Kang, Hyeon Ho Shin and Dong-Kwon Lim \*

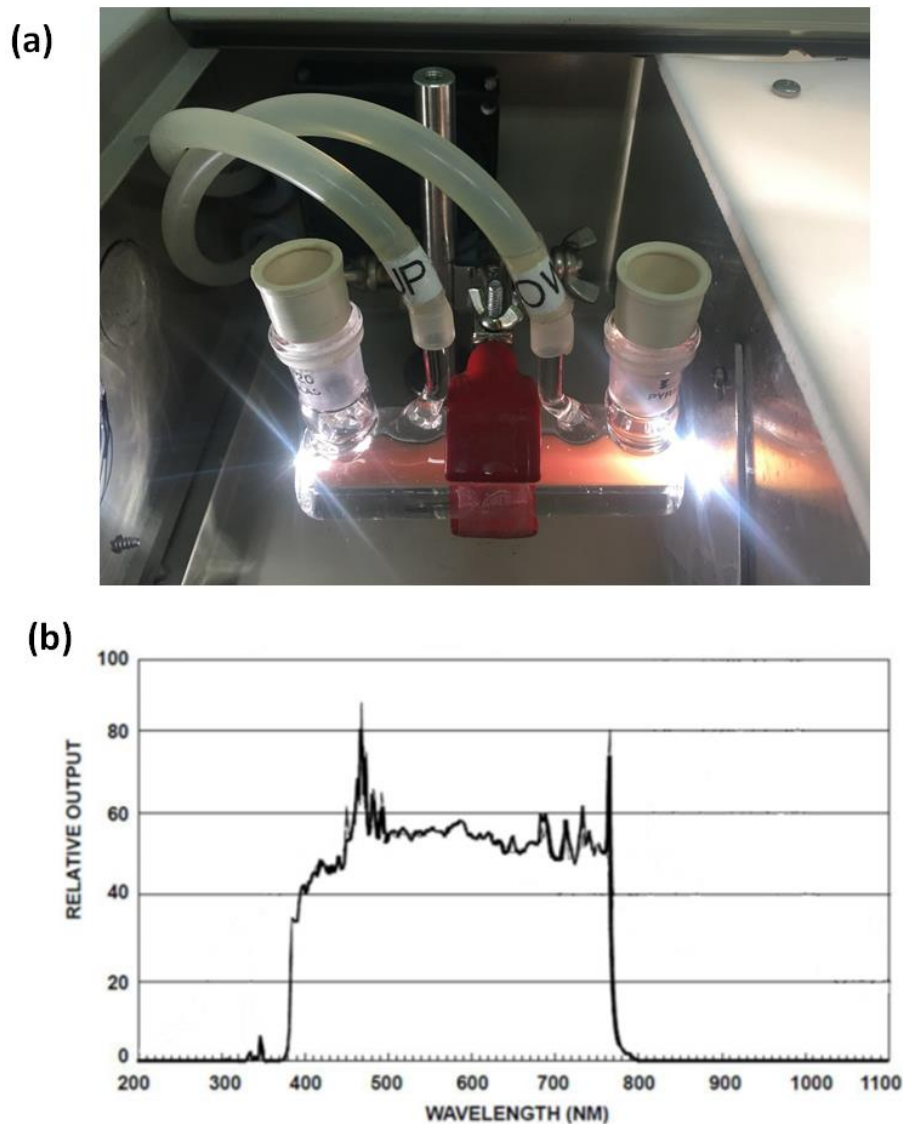

**Figure S1.** Instrumental setup for the Suzuki-Miyaura coupling reaction. (a) Light from the Xe lamp (400–780 nm) illuminates the reactor (Pyrex, 15 mL) equipped with a water circulation jacket. (b) The emission profiles of Xe-lamp used in this experiment.

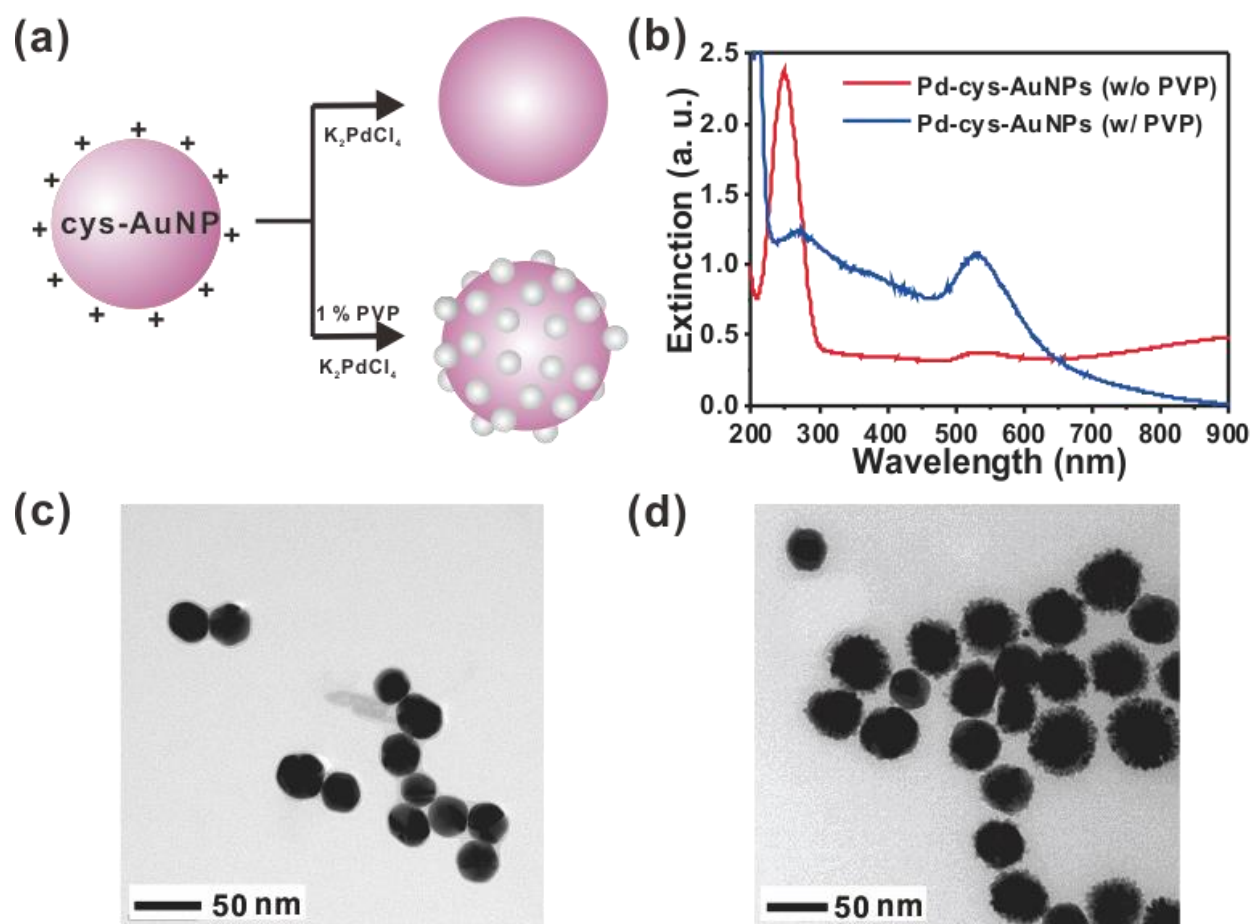

**Figure S2.** (a) Preparation of Pd-nanodot-decorated AuNPs using cysteamine-modified AuNPs with or without 1% PVP, (b) UV-Vis spectra of Pd-cys-AuNPs prepared with (blue-line) or without PVP (red-line), (c) TEM images of the nanoparticles prepared without 1% PVP, (d) TEM images of the nanoparticles prepared with 1% PVP.

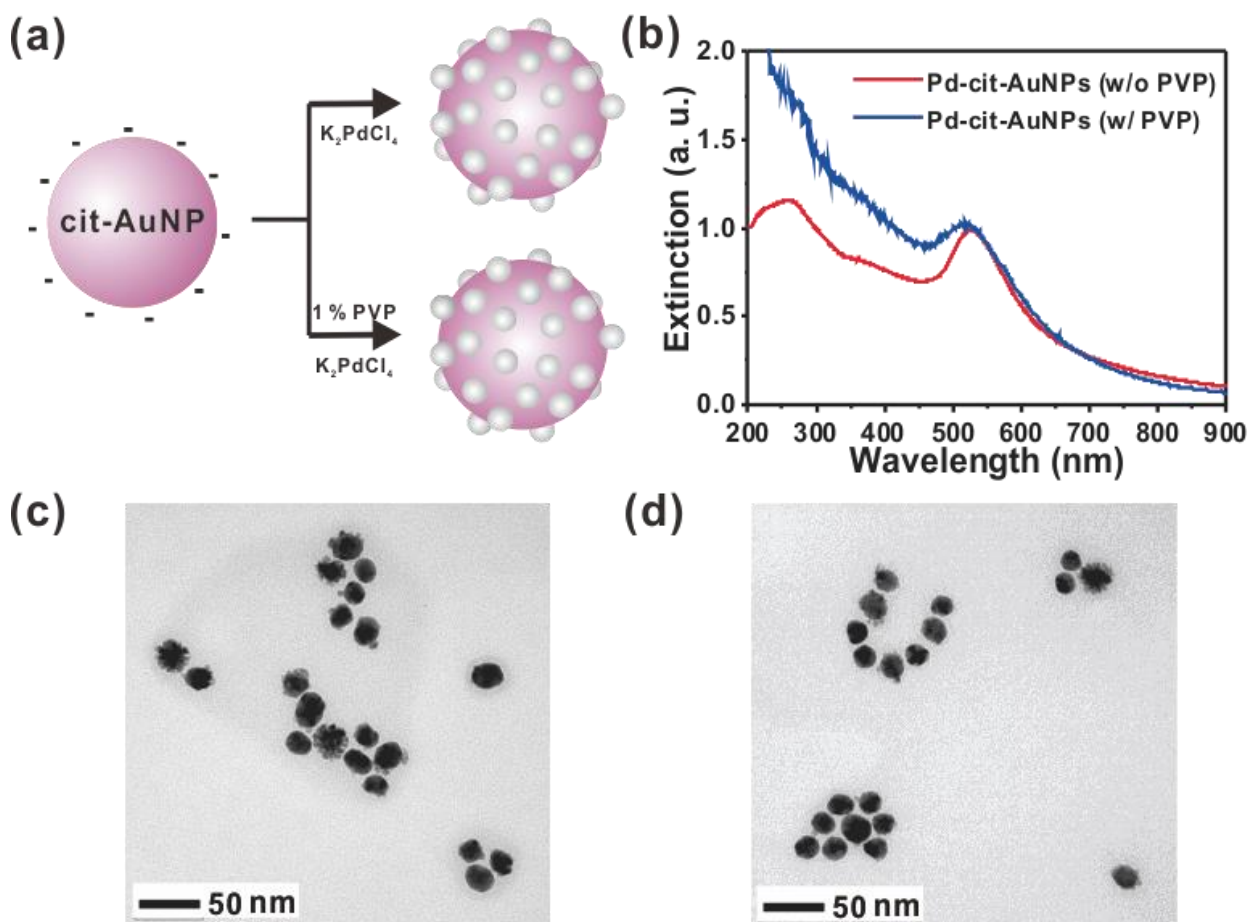

**Figure S3.** (a) Preparation of Pd-nanodot-decorated AuNPs using citrate-modified AuNPs with or without 1% PVP, (b) UV-Vis spectra of Pd-citrate-AuNPs prepared with (blue-line) or without PVP (red-line), (c) TEM images of the nanoparticles prepared without 1% PVP, (d) TEM images of the nanoparticles prepared with 1% PVP.

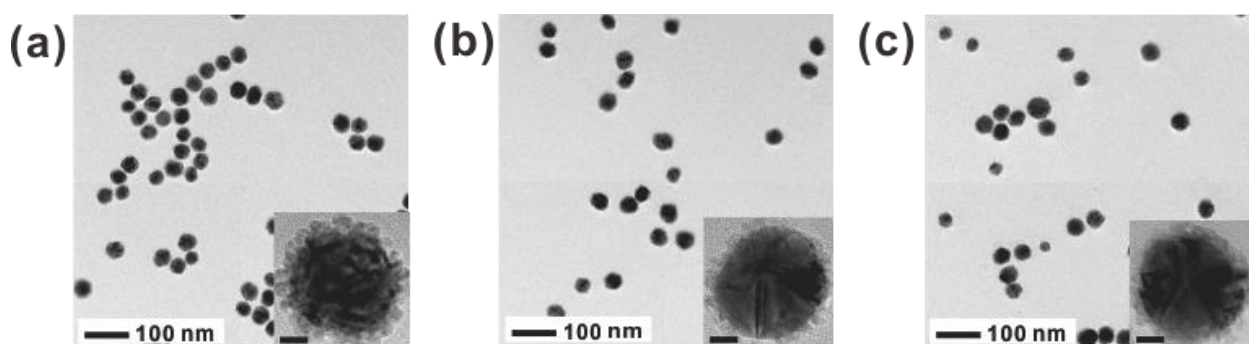

**Figure S4.** TEM images of (a) Pd-cys-AuNPs, (b) Pd-GO-AuNPs, and (c) Pd-rGO-AuNPs (Scale bar in the inset is 10 nm).

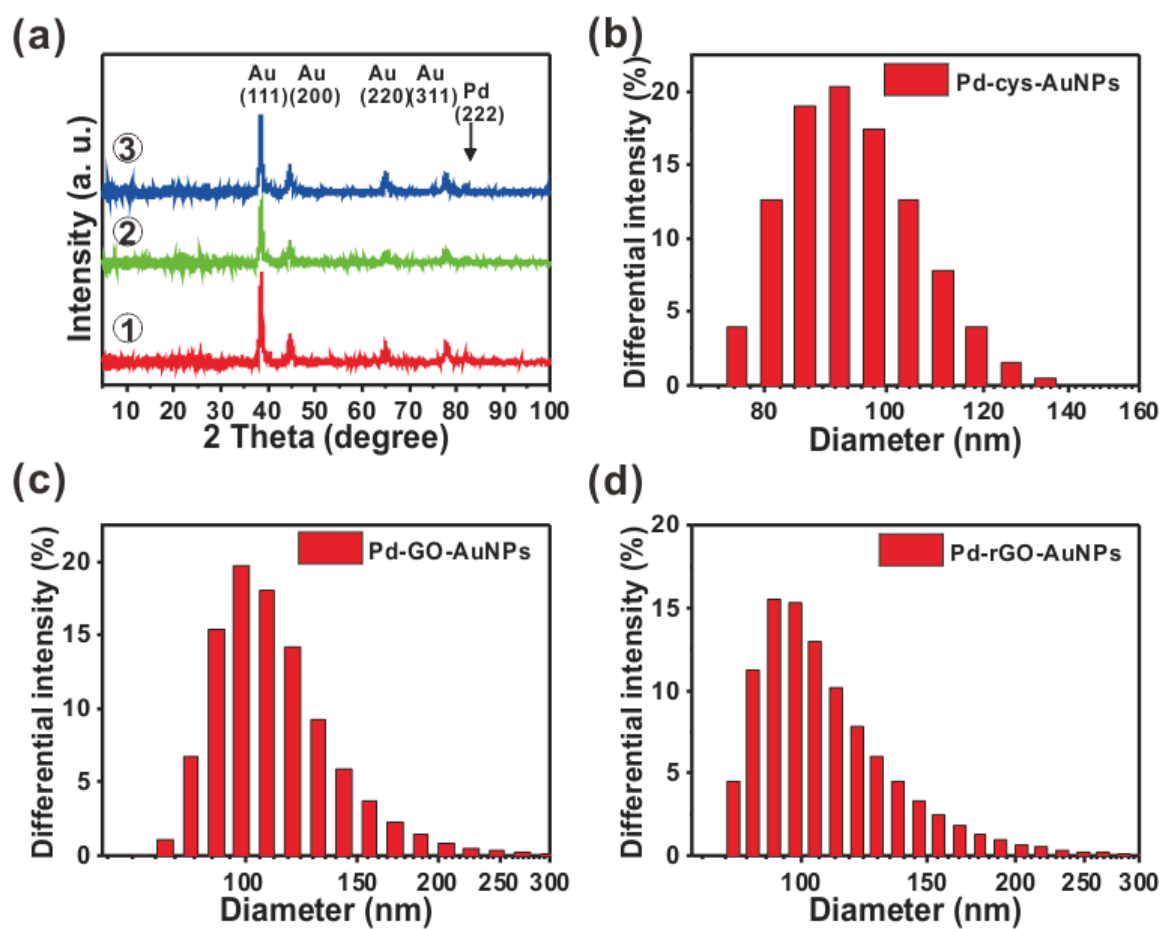

**Figure S5.** (a) XRD spectra and size distribution of (b) Pd-cys-AuNPs, (c) Pd-GO-AuNPs, and (d) Pd-rGO-AuNPs.

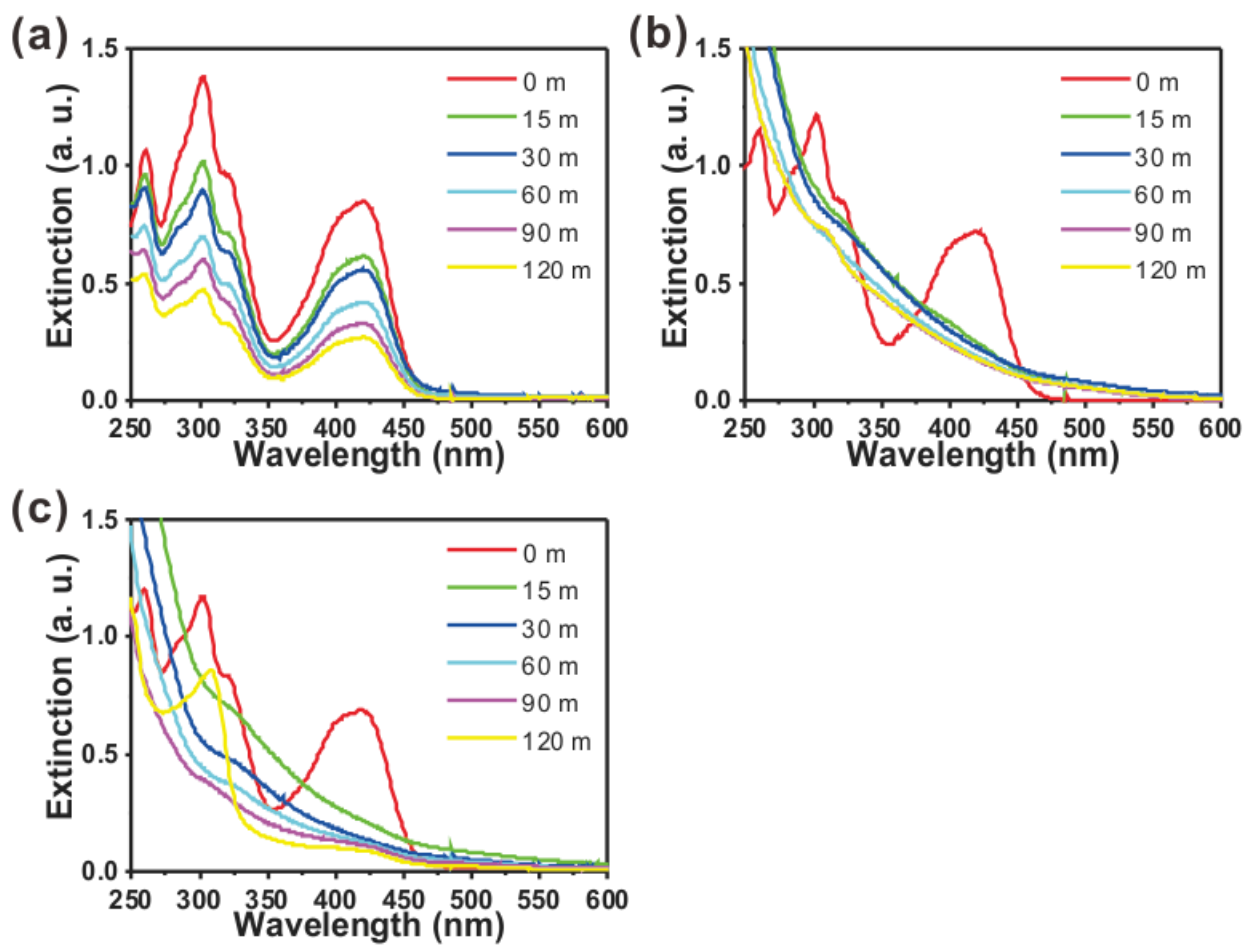

**Figure S6.** Time dependent reduction of  $\text{Fe}^{3+}$  to  $\text{Fe}^{2+}$  in the presence of (a) Pd-cys-AuNPs, (b) Pd-GO-AuNPs, and (c) Pd-rGO-AuNPs with Xe lamp illumination.

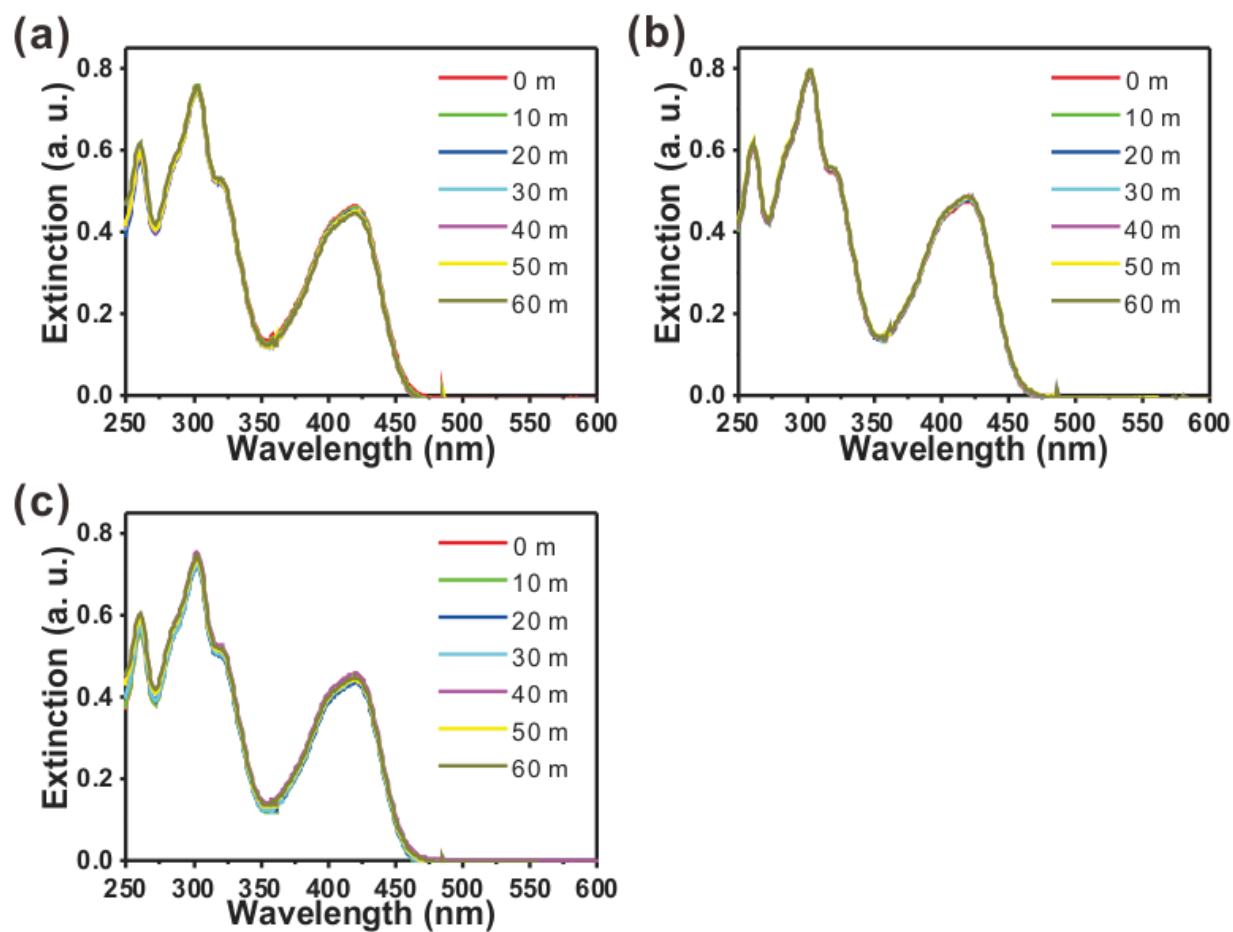

**Figure S7.** Time dependent reduction of  $\text{Fe}^{3+}$  to  $\text{Fe}^{2+}$  in the presence of (a) Pd-cys-AuNPs, (b) Pd-GO-AuNPs, and (c) Pd-rGO-AuNPs with NIR laser.

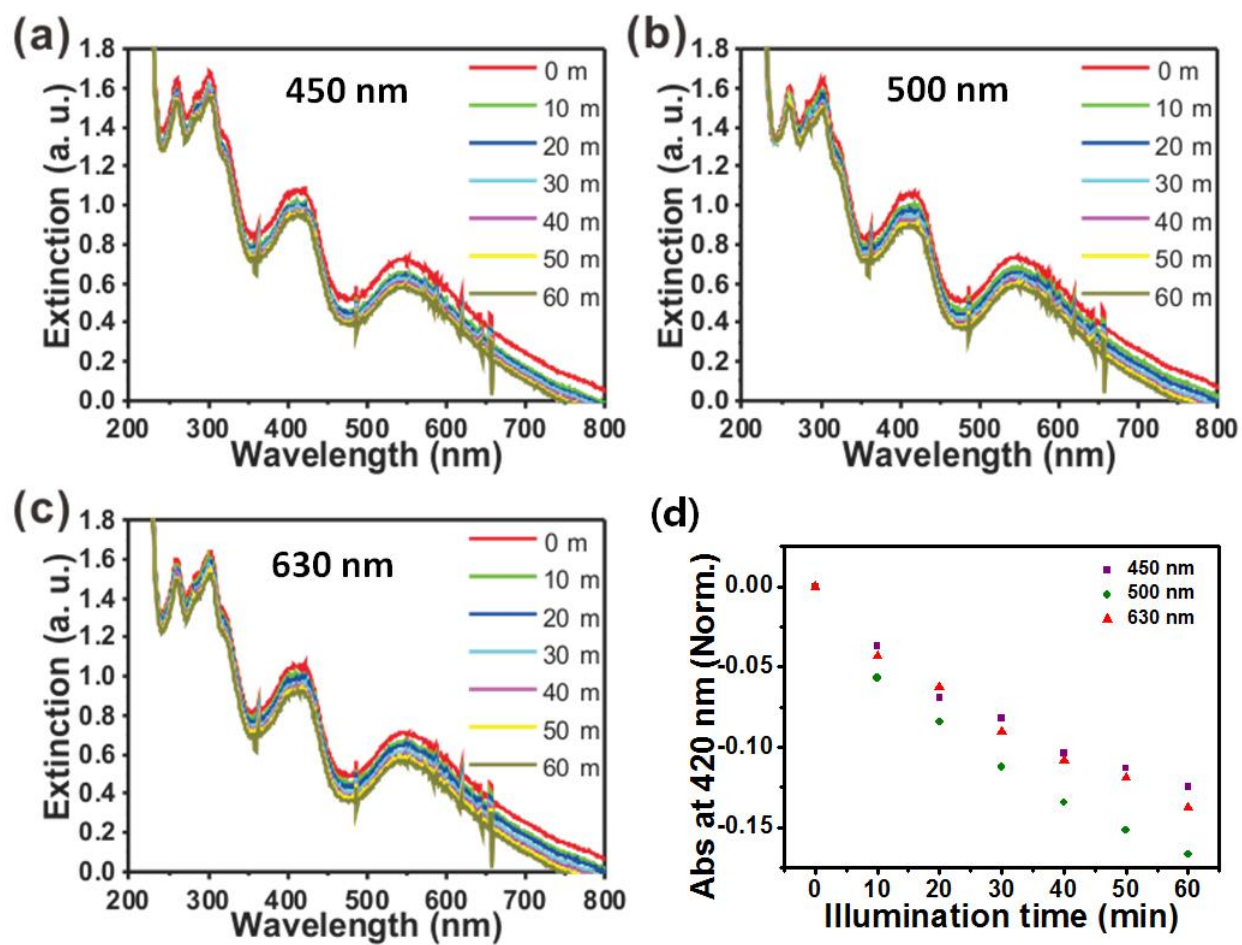

**Figure S8.** Wavelength dependent reduction of  $\text{Fe}^{3+}$  to  $\text{Fe}^{2+}$  in the presence of Pd-rGO-AuNPs with Xe lamp illumination and band-pass filter (450, 500, and 650 nm).



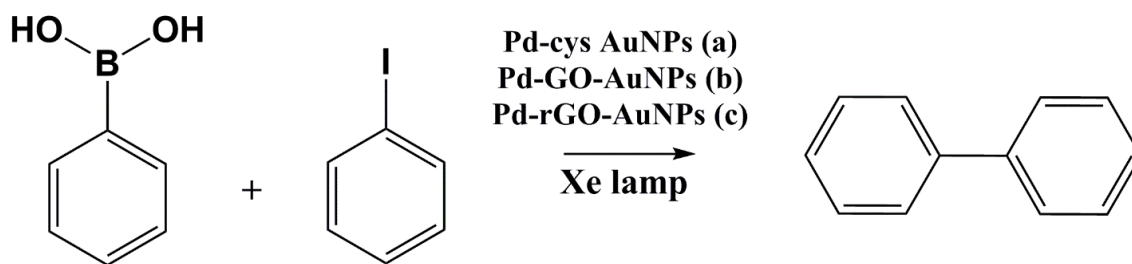

| Entry | Catalyst | Light source | Power (W/cm <sup>2</sup> ) | Temperature (initial/final, °C) | Yield* (%) | Conversion (%) |
|-------|----------|--------------|----------------------------|---------------------------------|------------|----------------|
| 1     | a        | Xe           | 5.24                       | 25/50                           | 29.8       | 45.1           |
| 2     | b        | Xe           | 5.24                       | 25/51                           | 56.0       | 62.7           |
| 3     | c        | Xe           | 5.24                       | 25/52                           | 66.4       | 70.6           |
| 4     | a        | Xe           | 5.24                       | 25/25                           | 6.7        | 31.1           |
| 5     | b        | Xe           | 5.24                       | 25/25                           | 30.9       | 36.8           |
| 6     | c        | Xe           | 5.24                       | 25/25                           | 55.6       | 40.8           |

\* Analytical yield is calculated based on the HPLC analysis and calibration curve.

$$* \text{ Conversion\%} = \frac{\text{Initial area of Iodobenzene} - \text{Final area of Iodobenzene}}{\text{Initial area of Iodobenzene}} \times 100$$

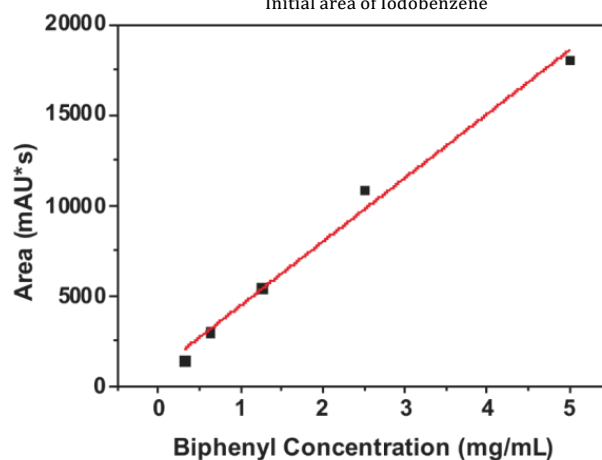

**Figure S9.** Results of photocatalytic reactions performed in the presence of (a) Pd-cys AuNPs, (b) Pd-GO-AuNPs, or (c) Pd-rGO-AuNPs at uncontrolled temperature (Entry 1,2,3) or at controlled temperature (25 °C) (Entry 4,5,6) and calibration curve for biphenyl product.



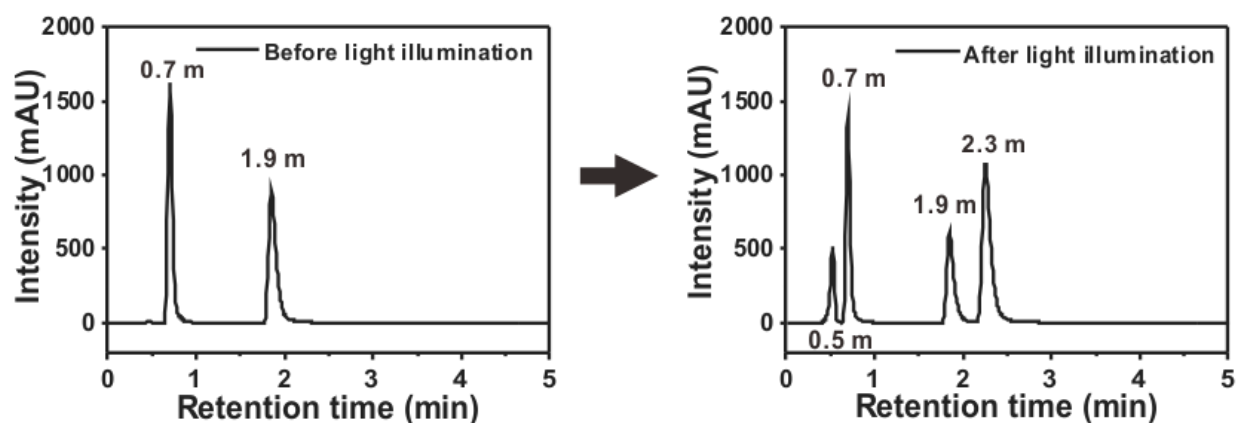

**Figure S10.** The representative chromatogram of the Suzuki-coupling reaction (Retention time: by product - 0.5 min, phenyl boronic acid - 0.7 min, iodobenzene - 1.9 min, biphenyl (product) - 2.3 min).

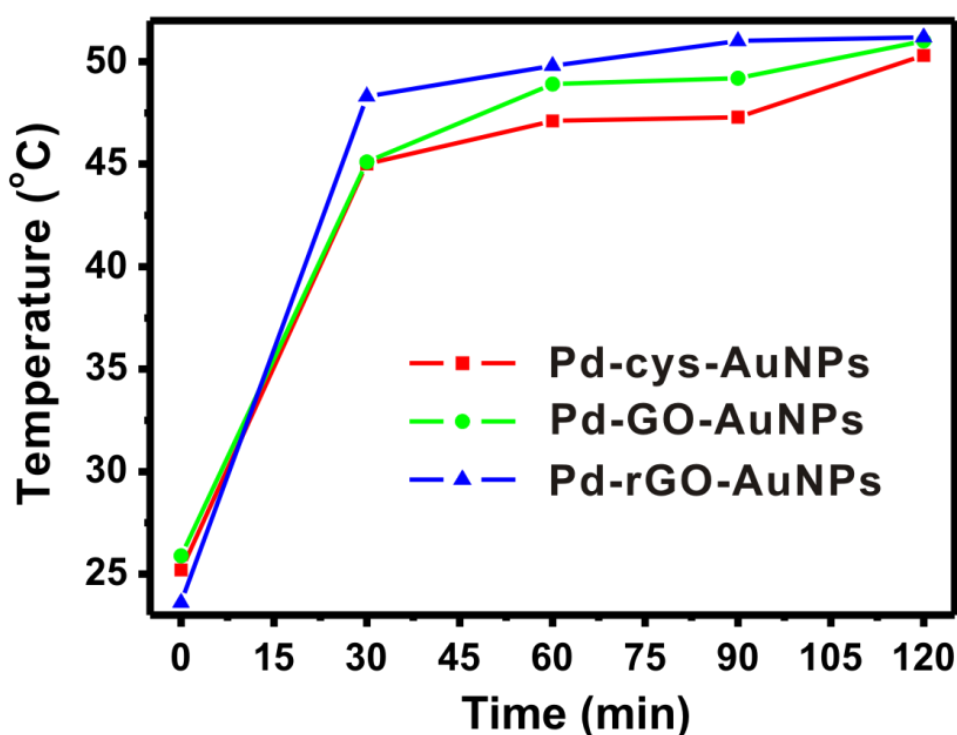

**Figure S11.** Temperature changes of reaction mixtures during the coupling reactions with light illumination in the presence of Pd-cys-AuNPs, Pd-GO-AuNPs, and Pd-rGO-AuNPs.

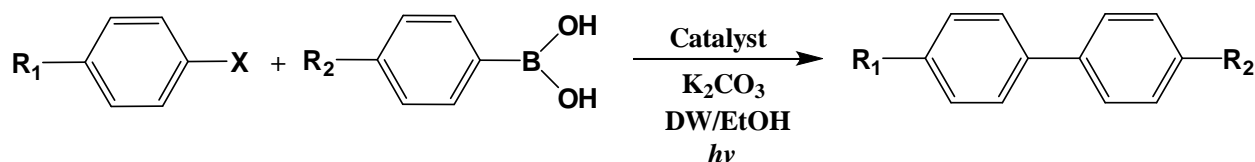

**Figure S12.** The summary of coupling reaction with various haloarenes and substituted phenylboronic acids in the presence of Pd rGO-AuNPs with light illumination.

| Entry | X  | R1  | R2  | Conversion (%) | Selectivity (%) |
|-------|----|-----|-----|----------------|-----------------|
| 1     | I  | H   | H   | 98.1           | 99.5            |
| 2     | I  | H   | CH3 | 99.2           | 95.3            |
| 3     | I  | CH3 | H   | 94.2           | 96.5            |
| 4     | Br | H   | H   | 75.5           | >99.9           |
| 5     | Cl | H   | H   | 31.1           | >99.9           |

\*Reaction condition: The Pd-rGO-AuNP solution (OD 0.4 at 540 nm, 5.0 mL) was mixed with phenylboronic acid (97.6 mg, 0.8 mmol), ethanol (6.25 mL), iodobenzene (44.5  $\mu$ L, 0.4 mmol), and  $K_2CO_3$  (1.25 mL, 1 mmol). Xe-lamp light illuminated to the reactor without controlling the reaction temperature and analysed the reaction mixtures with HPLC and determined the yield and impurity.

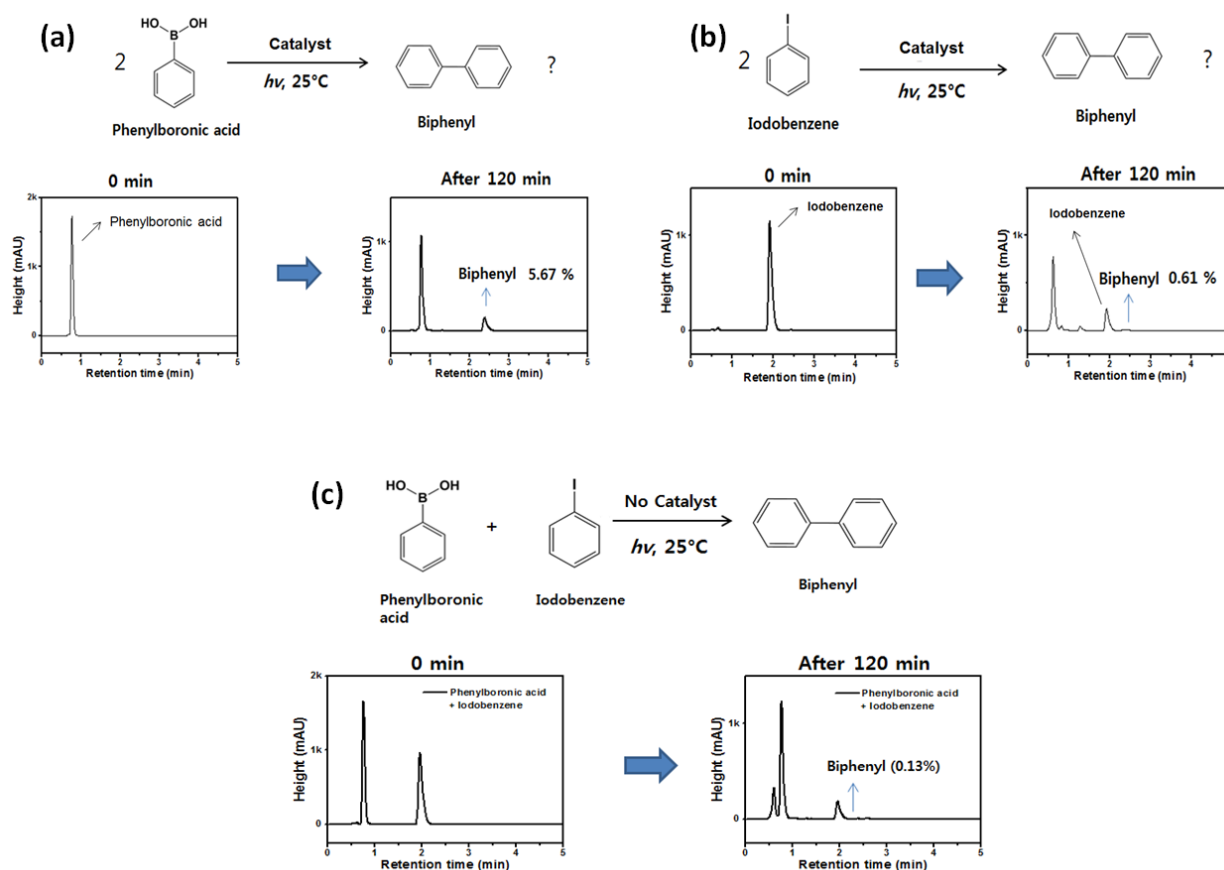

**Figure S13.** The results of self-coupling reaction with phenylboronic acid (a) or iodobenzene (b) in the presence of Pd rGO-AuNPs with light illumination. The visible light induced reaction without Pd rGO-AuNPs catalyst (c).

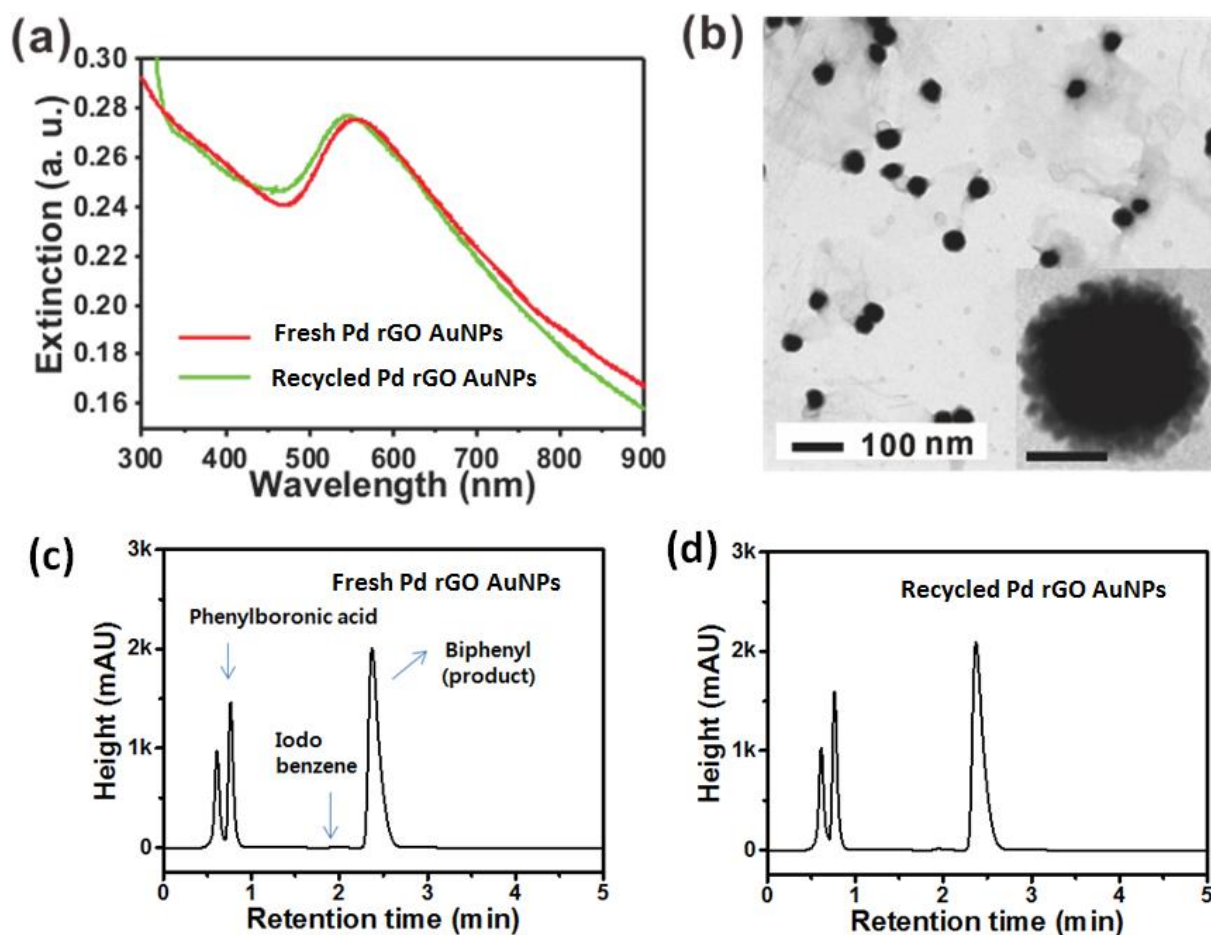

**Figure S14.** Comparison of Pd-rGO-AuNPs before and after the Suzuki-Miyaura coupling reaction. (a) UV-Vis spectra of Pd-rGO-AuNPs before (red line) and after reaction (green line), (b) TEM image of Pd-rGO-AuNPs after reaction (Scale bar in the inset is 20 nm). (c) The chromatogram of reaction mixtures after completion of reaction using fresh Pd rGO-AuNP catalyst. (d) The chromatogram of reaction mixtures after completion of reaction using recycled Pd rGO-AuNP catalyst.
